# Supplementary material
Source: PubMed Central journal article supplement (PMC2840325)
Supplement: 0914825107_pnas.200914825SI.pdf [file 0914825107_pnas.200914825SI.pdf]

# Supporting Information

Wang et al. 10.1073/pnas.0914825107

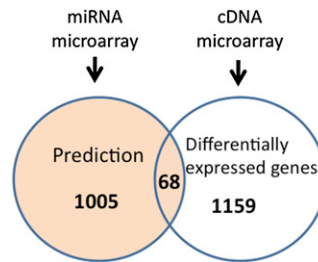

Fig. S1. Venn diagram of the overlap between differentially expressed genes from mRNA microarray data and putative miR targets.

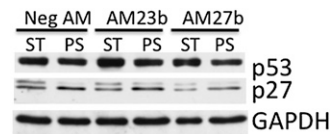

Fig. S2. Effects of miR-23b and -27b on cell cycle proteins. HUVECs were transfected with Neg. AM, AM23b, and AM27b. Twenty-four hours after transfection, cells were subjected to PS or ST for 24 h. Western blot analysis of p53 and p27<sup>kip</sup> expressions on total cell extract with antibodies against p53 and p27<sub>kip</sub> (Santa Cruz). Blots shown here are representative of three independent experiments with similar results.

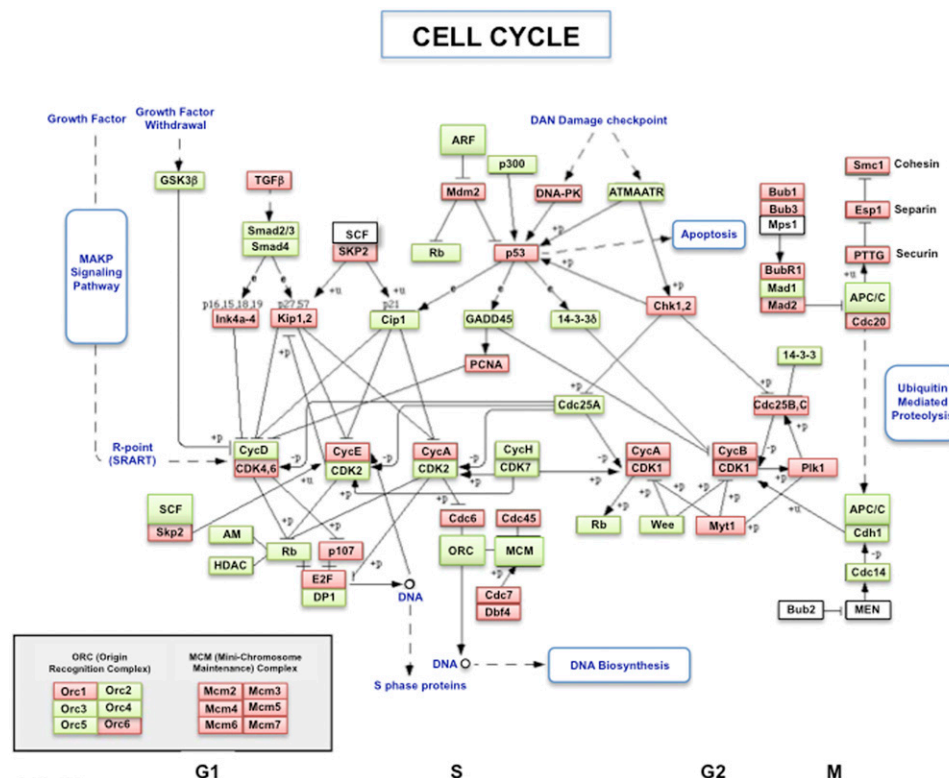

Fig. S3. Mapping of differentially expressed genes to "cell cycle" network. The figure of cell cycle network was obtained from KEGG pathway database. The boxes represent the components identified in human cell cycle regulations. The red boxes indicate that the corresponding mRNAs were differentially expressed in our PS vs. ST microarray data with the application of a 1.5-fold change cutoff. The green boxes represent the known molecules reported in the literature, and open boxes indicate the predicted molecules by the pathway finder.

**Table S1. The top 10 gene ontology terms of up- and down-regulated genes in ECs under PS vs. ST**

| GO terms representing cellular compartment |                                           |                         |
|--------------------------------------------|-------------------------------------------|-------------------------|
| GO                                         | Cellular compartment                      | P value                 |
| GO:0005694                                 | Chromosome                                | $3.60 \times 10^{-16}$  |
| GO:0044427                                 | Chromosomal part                          | $3.20 \times 10^{-15}$  |
| GO:0005819                                 | Spindle                                   | $9.90 \times 10^{-15}$  |
| GO:0000775                                 | Chromosome, pericentric region            | $1.80 \times 10^{-14}$  |
| GO:0015630                                 | Microtubule cytoskeleton                  | $2.40 \times 10^{-11}$  |
| GO:0043232                                 | Intracellular nonmembrane-bound organelle | $3.90E \times 10^{-7}$  |
| GO:0043228                                 | Nonmembrane-bound organelle               | $3.90 \times 10^{-7}$   |
| GO:0044430                                 | Cytoskeletal part                         | $1.80 \times 10^{-5}$   |
| GO:0005634                                 | Nucleus                                   | $2.30E \times 10^{-5}$  |
| GO:0005815                                 | Microtubule organizing center             | $4.10E \times 10^{-5}$  |
| GO terms representing molecular function   |                                           |                         |
| GO                                         | Molecular function                        | P value                 |
| GO:0005515                                 | Protein binding                           | $1.10E \times 10^{-11}$ |
| GO:0030554                                 | Adenyl nucleotide binding                 | $1.00E \times 10^{-7}$  |
| GO:0032559                                 | Adenyl ribonucleotide binding             | $1.50 \times 10^{-7}$   |
| GO:0005488                                 | Binding                                   | $2.00 \times 10^{-7}$   |
| GO:0005524                                 | ATP binding                               | $2.60 \times 10^{-7}$   |
| GO:0017076                                 | Purine nucleotide binding                 | $1.40 \times 10^{-6}$   |
| GO:0032555                                 | Purine ribonucleotide binding             | $1.90 \times 10^{-6}$   |
| GO:0032553                                 | Ribonucleotide binding                    | $1.90 \times 10^{-6}$   |
| GO:0008094                                 | DNA-dependent ATPase activity             | $2.30 \times 10^{-5}$   |
| GO:0000166                                 | Nucleotide binding                        | $2.70 \times 10^{-5}$   |

**Table S2. Validation of selected miRs with TaqMan RT-PCR**

| miR      | Microarray    | TaqMan PCR      |
|----------|---------------|-----------------|
| miR-27b  | $2.3 \pm 1.1$ | $2.6 \pm 0.4^*$ |
| miR-23b  | $1.7 \pm 0.4$ | $1.7 \pm 0.4^*$ |
| miR-923  | $2.2 \pm 0.1$ | $2.2 \pm 0.2^*$ |
| miR-16   | $0.5 \pm 0.1$ | $0.8 \pm 0.1^*$ |
| miR-106a | $0.6 \pm 0.1$ | $0.6 \pm 0.1^*$ |
| miR-19b  | $0.3 \pm 0.1$ | $1 \pm 0.2$     |
| miR-221  | $0.7 \pm 0.1$ | $1.3 \pm 0.1$   |
| miR-26b  | —             | $1.1 \pm 0.1^*$ |
| let-7e   | —             | $1.1 \pm 0.1^*$ |

\*indicates the PCR results are in agreement with microarray data.

**Table S3. The overlapping GO terms between putative miR targets and differentially expressed genes**

| GO         | Biological process                                       | P value               |
|------------|----------------------------------------------------------|-----------------------|
| GO:0000079 | Regulation of cyclin-dependent protein kinase activity   | $2.84 \times 10^{-6}$ |
| GO:0022402 | Cell cycle process                                       | $6.82 \times 10^{-5}$ |
| GO:0051329 | Interphase of mitotic cell cycle                         | 0.0001095             |
| GO:0007017 | Microtubule-based process                                | 0.0002482             |
| GO:0007001 | Chromosome organization and biogenesis (sensu Eukaryota) | 0.0027113             |
| GO:0043549 | Regulation of kinase activity                            | 0.0066311             |
| GO:0050790 | Regulation of catalytic activity                         | 0.0096842             |
| GO:0007050 | Cell cycle arrest                                        | 0.017707              |
| GO:0007154 | Cell communication                                       | 0.03393               |
| GO:0048839 | Inner ear development                                    | 0.0433963             |
| GO:0006865 | Amino acid transport                                     | 0.0472377             |
